# Supplementary material for: The Influence of DNA Extraction and Lipid Removal on Human Milk Bacterial Profiles
Source: MDPI journal article supplement (doi:10.3390/mps3020039), 2020-05-15
Supplement: s1 [file s1]

**S6 Table: Reproducibility of extractions tested using multiple R-squared**

|       | Multiple R-square |           |
|-------|-------------------|-----------|
|       | Whole milk        | Skim milk |
| Kit B | 0.4908            | 0.7581    |
| Kit C | 0.7421            | 0.4751    |
| Kit D | 0.9483            | 0.7976    |
