# Supplementary material for: The Influence of DNA Extraction and Lipid Removal on Human Milk Bacterial Profiles
Source: MDPI journal article supplement (doi:10.3390/mps3020039), 2020-05-15
Supplement: s1 [file s1]

**S1 Table: Zymobiomics™ microbial community standard composition as per manufacturer's specifications.**

| Bacterial taxa             | gDNA abundance<br>(%) | mOTU abundance<br>(%) | Gram stain |
|----------------------------|-----------------------|-----------------------|------------|
| <i>Pseudomonas</i> spp.    | 12%                   | 4.6                   | -          |
| Enterobacteriaceae 1       | 12%                   | 11.3                  | -          |
| Enterobacteriaceae 2       | 12%                   | 10.0                  | -          |
| <i>Listeria</i> spp.       | 12%                   | 15.9                  | +          |
| <i>Staphylococcus</i> spp. | 12%                   | 13.3                  | +          |
| <i>Lactobacillus</i> spp.  | 12%                   | 18.8                  | +          |
| <i>Enterococcus</i> spp.   | 12%                   | 10.4                  | +          |
| <i>Bacillus</i> spp.       | 12%                   | 15.7                  | +          |
