# Supplementary material for: The Influence of DNA Extraction and Lipid Removal on Human Milk Bacterial Profiles
Source: MDPI journal article supplement (doi:10.3390/mps3020039), 2020-05-15
Supplement: s1 [file s1]

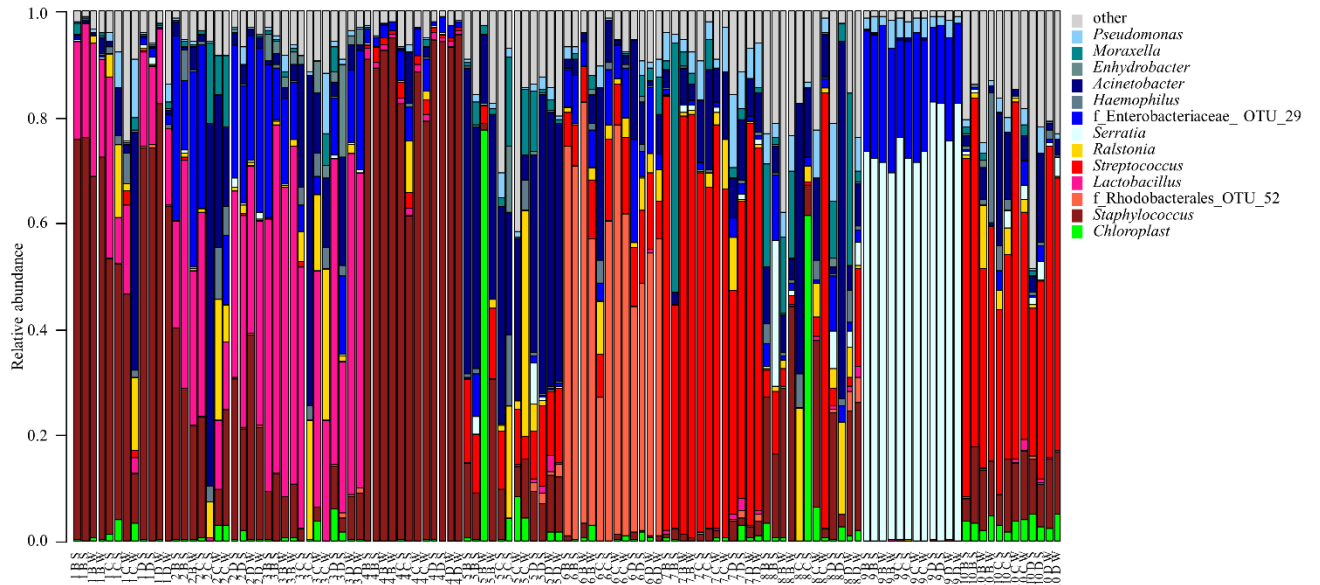

**S6 Figure: Relative abundances of bacterial composition in un-spiked human breast milk samples at genus level.** Each bar represents a sample and each coloured box, a bacterium. Genera less than 0.5% abundance in a given sample are included in the “other” at the top of the graph (grey boxes).
