# Supplementary material for: The Influence of DNA Extraction and Lipid Removal on Human Milk Bacterial Profiles
Source: MDPI journal article supplement (doi:10.3390/mps3020039), 2020-05-15
Supplement: s1 [file s1]

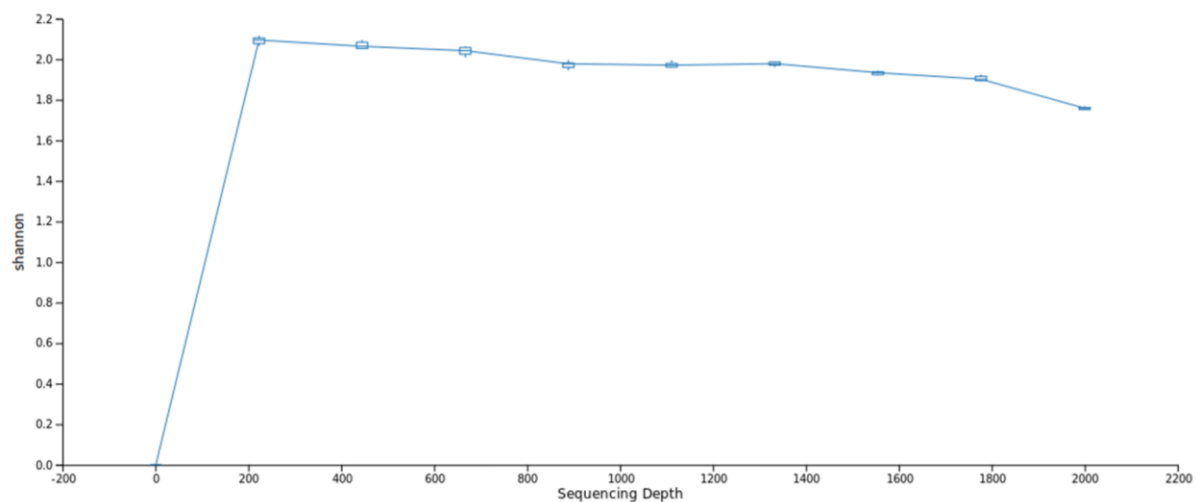

**Figure S5: Alpha diversity rarefaction curve.** A line graph relating the sequencing depth to Shannon diversity index of sequenced un-spiked breast milk samples at a sub-sampling depth of 2100.
