# Supplementary material for: The Influence of DNA Extraction and Lipid Removal on Human Milk Bacterial Profiles
Source: MDPI journal article supplement (doi:10.3390/mps3020039), 2020-05-15
Supplement: s1 [file s1]

**S2 Table: Primers, probes and cycling conditions**

|          |           | Forward primer                           | Reverse primer                              | Probe                                            | PCR cycling conditions                                                    |
|----------|-----------|------------------------------------------|---------------------------------------------|--------------------------------------------------|---------------------------------------------------------------------------|
| <b>A</b> | qPCR      | 16S-F1(5'-CGA AAG CGT GGG GAG CAA A -3') | 16S-R1(5'-GTT CGT ACT CCC CAG GCG G-3')     | 16S-P1<br>(FAM- ATT AGA TAC CCT GGT AGT CCA –MGB | 45 cycles<br>50 °C 95 °C 95 °C 60 °C 72 °C<br>2min 10min 15s 60s 1s       |
| <b>B</b> | Short PCR | (515Fshort)<br>GTGCCAGCHGCGYGCGGT        | (806Rshort)<br>GGACTACNNGGGTNTCTAAT         | -                                                | 10 cycles<br>95 °C 95 °C 50 °C 72 °C 72 °C 4 °C<br>3min 30s 30s 1s 5min ∞ |
| <b>C</b> | Long PCR  | (515Flong)<br>GTGCCAGCHGCGYGCGGT         | (806Rlong_barcoded)<br>GGACTACNNGGGTNTCTAAT | -                                                | 30 cycles<br>95 °C 95 °C 50 °C 72 °C 72 °C 4 °C<br>3min 30s 30s 1s 5min ∞ |
