# Supplementary material for: The Influence of DNA Extraction and Lipid Removal on Human Milk Bacterial Profiles
Source: MDPI journal article supplement (doi:10.3390/mps3020039), 2020-05-15
Supplement: s1 [file s1]

**S4 Table: Beta diversity (Bray-Curtis dissimilarity index) measuring dissimilarity between Zymobiomics microbial community standard (ZMCS) and the milk type, for each of the kits.**

| Kits           | Milk type |            |
|----------------|-----------|------------|
|                | Skim milk | Whole milk |
| Kit A vs. ZMCS | 0.29      | 0.25       |
| Kit B vs. ZMCS | 0.06      | 0.16       |
| Kit C vs. ZMCS | 0.16      | 0.16       |
| Kit D vs. ZMCS | 0.11      | 0.20       |
