# Supplementary material for: The Influence of DNA Extraction and Lipid Removal on Human Milk Bacterial Profiles
Source: MDPI journal article supplement (doi:10.3390/mps3020039), 2020-05-15
Supplement: s1 [file s1]

**S5 Table: Differential abundances of statistically significant bacteria taxa in relation to extraction kits and milk type in un-spiked breast milk samples.**

| Taxonomy level       | Kit B     | Kit C      | Kit D  | p-value |
|----------------------|-----------|------------|--------|---------|
| <b>KITS</b>          |           |            |        |         |
| Proteobacteria       | 0.3436    | 0.4761     | 0.3772 | 0.005   |
| Alphaproteobacteria  | 0.0135    | 0.0162     | 0.0093 | 0.001   |
| Sphingomonadales     | 0.0058    | 0.0087     | 0.0039 | <0.001  |
| Rhodobacterales      |           |            |        |         |
| OTU_52               | 0.0712    | 0.0564     | 0.0561 | 0.035   |
| Betaproteobacteria   | 0.0294    | 0.089      | 0.0271 | <0.001  |
| Burkholderiales      | 0.0244    | 0.0856     | 0.0242 | <0.001  |
| Burkholderiaceae     | 0.007     | 0.0758     | 0.0176 | <0.001  |
| <i>Ralstonia</i>     | 0.007     | 0.075      | 0.0175 | <0.001  |
| Gammaproteobacteria  |           |            |        |         |
| Pseudomonadales      | 0.1157    | 0.2086     | 0.1607 | <0.001  |
| Pseudomonadaceae     | 0.0167    | 0.0259     | 0.024  | 0.016   |
| <i>Pseudomonas</i>   | 0.0165    | 0.0259     | 0.024  | 0.016   |
| Pasteurellales       | 0.1109    | 0.2205     | 0.0045 | <0.001  |
| Pasteurellaceae      | 0.011     | 0.2205     | 0.0045 | <0.001  |
| <i>Haemophilus</i>   | 0.011     | 0.022      | 0.0045 | <0.001  |
| Moraxellaceae        |           |            |        |         |
| <i>Acinetobacter</i> | 0.0606    | 0.1544     | 0.1026 | <0.001  |
| <b>Firmicutes</b>    |           |            |        |         |
| Bacillus             |           |            |        |         |
| Lactobacillales      |           |            |        |         |
| Lactobacillaceae     | 0.1084    | 0.0632     | 0.1088 | <0.001  |
| <i>Lactobacillus</i> | 0.1084    | 0.0632     | 0.1088 | <0.001  |
| <b>WM/SM</b>         |           |            |        |         |
|                      | Skim milk | Whole milk |        |         |
| Pseudomonadales      | 0.1948    | 0.1288     | --     | 0.009   |
| Moraxellaceae        | 0.1721    | 0.1068     | --     | 0.004   |
| <i>Enhydrobacter</i> | 0.0078    | 0.0039     | --     | 0.002   |
| <i>Acinetobacter</i> | 0.1353    | 0.0767     | --     | 0.003   |

Mean values of relative abundance proportions for statistically significant bacteria at different taxonomy levels are shown. *p*-values are Benjamini-Hochberg corrected. *p*-values are represented as ‘\*\*\*’ 0.001; ‘\*\*’ 0.01; and ‘\*’ 0.05. WM and SM represents whole milk and skim milk respectively.
