# Supplementary material for: The Influence of DNA Extraction and Lipid Removal on Human Milk Bacterial Profiles
Source: MDPI journal article supplement (doi:10.3390/mps3020039), 2020-05-15
Supplement: s1 [file s1]

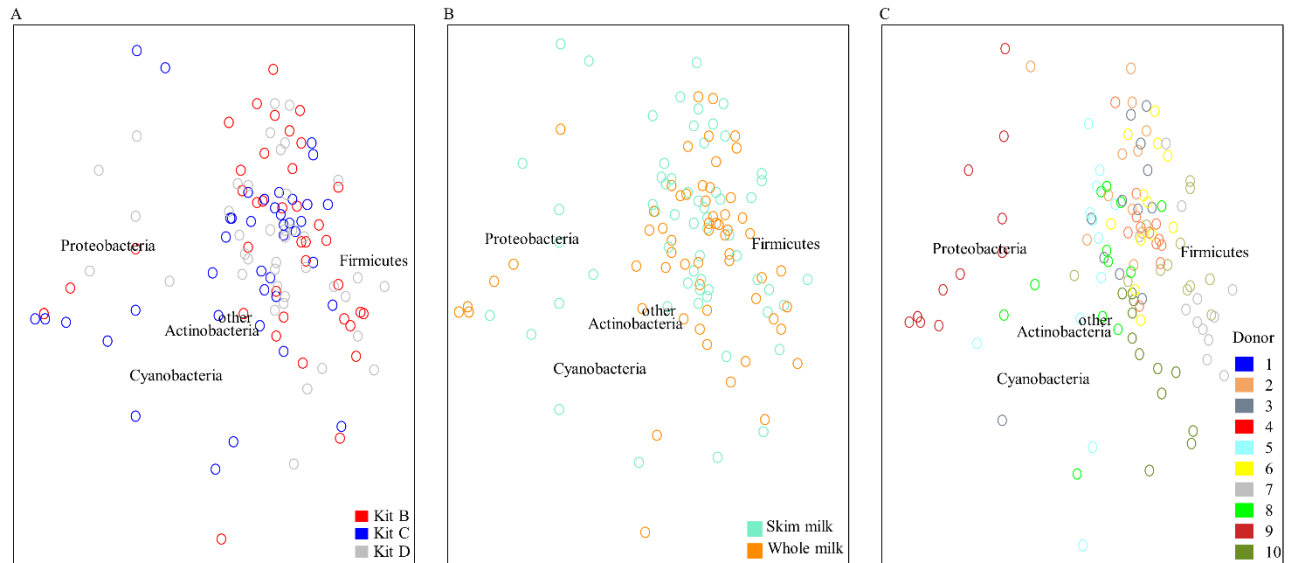

**S7 Figure: Log ratio biplot human of human breast milk bacterial abundances at the phylum level.** Samples are coloured according to (a) extraction kit used, and (b) whole and skim milk (c) donors. Points (circles) that cluster together are similar in bacterial composition and abundance.
