# Supplementary material for: The Influence of DNA Extraction and Lipid Removal on Human Milk Bacterial Profiles
Source: MDPI journal article supplement (doi:10.3390/mps3020039), 2020-05-15
Supplement: s1 [file s1]

**S3 Table.** Bacterial 16S DNA concentration in the spiked and un-spiked human breast milk sample.

| Sample_ID                                                   | Spike/unspike_Kit | Donor sample | WM/SM | Template DNA 16SqPCR concentration (ng/ul) | Median 16S qPCR DNA concentration | %16S DNA in HBM sample | 16S gene copy number/ul |
|-------------------------------------------------------------|-------------------|--------------|-------|--------------------------------------------|-----------------------------------|------------------------|-------------------------|
| BM_AO_KITdnam_extractioncontrolspike_1_kitcomparison_P3_A06 | Spiked_Kit A      | 1            | WM    | 0.251124139                                | 0.195487886                       | 99.975%                | 354043.0421             |
| BM_AO_KITdnam_extractioncontrolspike_1_kitcomparison_P3_A07 | Spiked_Kit A      | 1            | WM    | 0.175701367                                |                                   |                        | 247709.5464             |
| BM_AO_KITdnam_extractioncontrolspike_1_kitcomparison_P3_B06 | Spiked_Kit A      | 1            | SM    | 0.215274404                                | 0.000047105                       | 0.024%                 | 303500.9107             |
| BM_AO_KITdnam_extractioncontrolspike_1_kitcomparison_P3_B07 | Spiked_Kit A      | 1            | SM    | 0.047838204                                |                                   |                        | 67443.86864             |
| BM_AO_KITdnam_skin_1_kitcomparison_P3_C01                   | Unspiked_Kit A    | 1            | SM    | 0.000047258                                | 0.000047105                       | 0.024%                 | 66.62577892             |
| BM_AO_KITdnam_skin_1_kitcomparison_P3_C08                   | Unspiked_Kit A    | 1            | SM    | 0.000046952                                |                                   |                        | 66.19495263             |
| BM_AO_KITdnam_whole_1_kitcomparison_P3_A01                  | Unspiked_Kit A    | 1            | WM    | 0.000068726                                | 0.151318187                       | 99.983%                | 96.89241007             |
| BM_AO_KITdnam_whole_1_kitcomparison_P3_A08                  | Unspiked_Kit A    | 1            | WM    | 0.000045226                                |                                   |                        | 63.76078519             |
| BM_AO_KITqias_extractioncontrol_1_kitcomparison_P4_A06      | Spiked_Kit C      | 1            | WM    | 0.332685221                                | 0.151318187                       | 99.983%                | 469030.529              |
| BM_AO_KITqias_extractioncontrol_1_kitcomparison_P4_A07      | Spiked_Kit C      | 1            | WM    | 0.293789111                                |                                   |                        | 414193.5186             |
| BM_AO_KITqias_extractioncontrol_1_kitcomparison_P4_B06      | Spiked_Kit C      | 1            | SM    | 0.002849745                                | 0.000025238                       | 0.016%                 | 4017.664268             |
| BM_AO_KITqias_extractioncontrol_1_kitcomparison_P4_B07      | Spiked_Kit C      | 1            | SM    | 0.008847263                                |                                   |                        | 12473.16112             |
| BM_AO_KITqias_skin_1_kitcomparison_P4_C01                   | Unspiked_Kit C    | 1            | SM    | 0.000060109                                | 0.000025238                       | 0.016%                 | 84.743781               |
| BM_AO_KITqias_skin_1_kitcomparison_P4_C08                   | Unspiked_Kit C    | 1            | SM    | 0.000024687                                |                                   |                        | 34.80428223             |
| BM_AO_KITqias_whole_1_kitcomparison_P4_A01                  | Unspiked_Kit C    | 1            | WM    | 0.000025790                                | 0.843423774                       | 99.989%                | 36.35925842             |
| BM_AO_KITqias_whole_1_kitcomparison_P4_A08                  | Unspiked_Kit C    | 1            | WM    | 0.000020727                                |                                   |                        | 29.22103109             |
| BM_AO_KITzymob_extractioncontrol_1_kitcomparison_P4_G06     | Spiked_Kit D      | 1            | WM    | 1.214408365                                | 0.843423774                       | 99.989%                | 1712112.716             |
| BM_AO_KITzymob_extractioncontrol_1_kitcomparison_P4_G07     | Spiked_Kit D      | 1            | WM    | 0.397619204                                |                                   |                        | 560576.5863             |
| BM_AO_KITzymob_extractioncontrol_1_kitcomparison_P4_H06     | Spiked_Kit D      | 1            | SM    | 0.792653652                                | 0.000087592                       | 0.01%                  | 1117509.098             |
| BM_AO_KITzymob_extractioncontrol_1_kitcomparison_P4_H07     | Spiked_Kit D      | 1            | SM    | 0.894193897                                |                                   |                        | 1260663.863             |
| BM_AO_KITzymob_skin_1_kitcomparison_P4_G01                  | Unspiked_Kit D    | 1            | SM    | 0.000066957                                | 0.000087592                       | 0.01%                  | 94.29819402             |
| BM_AO_KITzymob_skin_1_kitcomparison_P4_G08                  | Unspiked_Kit D    | 1            | SM    | 0.000108227                                |                                   |                        | 152.58203               |
| BM_AO_KITzymob_whole_1_kitcomparison_P4_E01                 | Unspiked_Kit D    | 1            | WM    | 0.000059373                                | 0.898759654                       | 99.984%                | 83.70631017             |
| BM_AO_KITzymob_whole_1_kitcomparison_P4_E08                 | Unspiked_Kit D    | 1            | WM    | 0.000198393                                |                                   |                        | 279.700552              |
| BM_AO_KITzymo_extractioncontrol_1_kitcomparison_P3_G06      | Spiked_Kit B      | 1            | WM    | 0.703367972                                | 0.898759654                       | 99.984%                | 991631.2204             |
| BM_AO_KITzymo_extractioncontrol_1_kitcomparison_P3_G07      | Spiked_Kit B      | 1            | WM    | 1.094151356                                |                                   |                        | 1542870.415             |
| BM_AO_KITzymo_extractioncontrol_1_kitcomparison_P3_H06      | Spiked_Kit B      | 1            | SM    | 0.654916126                                | 0.000141692                       | 0.015%                 | 623322.2206             |
| BM_AO_KITzymo_extractioncontrol_1_kitcomparison_P3_H07      | Spiked_Kit B      | 1            | SM    | 1.123935714                                |                                   |                        | 1584561.408             |
| BM_AO_KITzymo_skin_1_kitcomparison_P3_G01                   | Unspiked_Kit B    | 1            | SM    | 0.000194474                                | 0.000141692                       | 0.015%                 | 274.1758909             |
| BM_AO_KITzymo_skin_1_kitcomparison_P3_G08                   | Unspiked_Kit B    | 1            | SM    | 0.000211923                                |                                   |                        | 298.7761734             |
| BM_AO_KITzymo_whole_1_kitcomparison_P3_E01                  | Unspiked_Kit B    | 1            | WM    | 0.000025051                                | 0.000088910                       |                        | 35.28893217             |
| BM_AO_KITzymo_whole_1_kitcomparison_P3_E08                  | Unspiked_Kit B    | 1            | WM    | 0.000088910                                |                                   |                        | 125.3482042             |

ZMCS: Zymobiomics Microbial Community Standard; HBM: Human breast milk; SM: Skim milk; WM: Whole milk
